# Supplementary material for: Helicobacter pylori and Human Immunodeficiency Virus Co-Infection: Potential Implications for Future Gastric Cancer Risk
Source: MDPI journal article supplement (doi:10.3390/microorganisms11040887), 2023-03-29
Supplement: s1 [file s1]

Supplemental Table S1. Global estimate of people living with HIV, *H. pylori*, and *H. pylori* co-infection based on available data for both infections in UN regions (in bold) and in UN sub-regions

|                                                      | <i>Population</i> | <i>HIV</i>  |                      | <i>Helicobacter pylori</i> |                      | <i>Helicobacter pylori – HIV co-infection</i> |                      |
|------------------------------------------------------|-------------------|-------------|----------------------|----------------------------|----------------------|-----------------------------------------------|----------------------|
| <b>UN region and sub-region</b>                      | <b>Size</b>       | <b>Size</b> | <b>Prevalence, ‰</b> | <b>Size</b>                | <b>Prevalence, %</b> | <b>Size</b>                                   | <b>Prevalence, ‰</b> |
| <b>Sub-Saharan Africa</b>                            | 342,945,000       | 9,520,000   | 27.8                 | 278,373,713                | 81.17                | 7,527,255                                     | 21.9                 |
| Africa - West and Central                            | 288,455,000       | 2,320,000   | 8.0                  | 236,067,677                | 81.84                | 1,937,175                                     | 6.7                  |
| Africa – South, and East                             | 54,490,000        | 7,200,000   | 132.1                | 42,306,036                 | 77.64                | 5,590,080                                     | 102.6                |
| <b>North Africa - Middle East</b>                    | 109,040,000       | 24,500      | 0.2                  | 50,423,474                 | 46.24                | 13,666                                        | 0.1                  |
| <b>North America &amp; South, West, North Europe</b> | 639,947,000       | 1,717,758   | 2.7                  | 263,657,561                | 41.20                | 706,896                                       | 1.1                  |
| North America                                        | 321,774,000       | 1,100,000   | 3.4                  | 114,552,012                | 35.60                | 391,602                                       | 1.2                  |
| North Europe †                                       | 24,355,000        | 32,600      | 1.3                  | 10,637,350                 | 43.68                | 16,970                                        | 0.7                  |
| South Europe †                                       | 120,510,000       | 302,400     | 2.5                  | 70,090,073                 | 58.16                | 180,420                                       | 1.5                  |
| West Europe †                                        | 173,308,000       | 282,758     | 1.6                  | 68,378,126                 | 39.45                | 117,904                                       | 0.7                  |
| <b>Eastern Europe and Central Asia</b>               | 191,136,000       | 1,039,100   | 5.4                  | 144,314,193                | 75.50                | 812,945                                       | 4.3                  |
| <b>Latin America and the Caribbean</b>               | 416,691,000       | 1,267,000   | 3.0                  | 263,359,005                | 63.20                | 831,381                                       | 2.0                  |
| <b>Asia and Pacific</b>                              | 3,593,969,000     | 5,178,702   | 1.4                  | 2,061,645,294              | 57.36                | 2,866,234                                     | 0.8                  |
| Oceania                                              | 4,259,000         | 3,200       | 0.8                  | 1,085,148                  | 25.48                | 815                                           | 0.2                  |
|                                                      |                   |             |                      |                            |                      |                                               |                      |

† refers to there is a North-South gradient for *H. pylori*-HIV co-infection prevalence , with Northern inferior to Southern Europe.

Supplement Table S2. Number and incidence rate and number and death rate from gastric cancer at the country's levels

Supplement Table S3. Incidence and deaths due to gastric cancer from 1990 to 2017 at regional and global levels

Global estimated number of *Helicobacter pylori*-HIV co-infections by United Nations regions for the year 2015

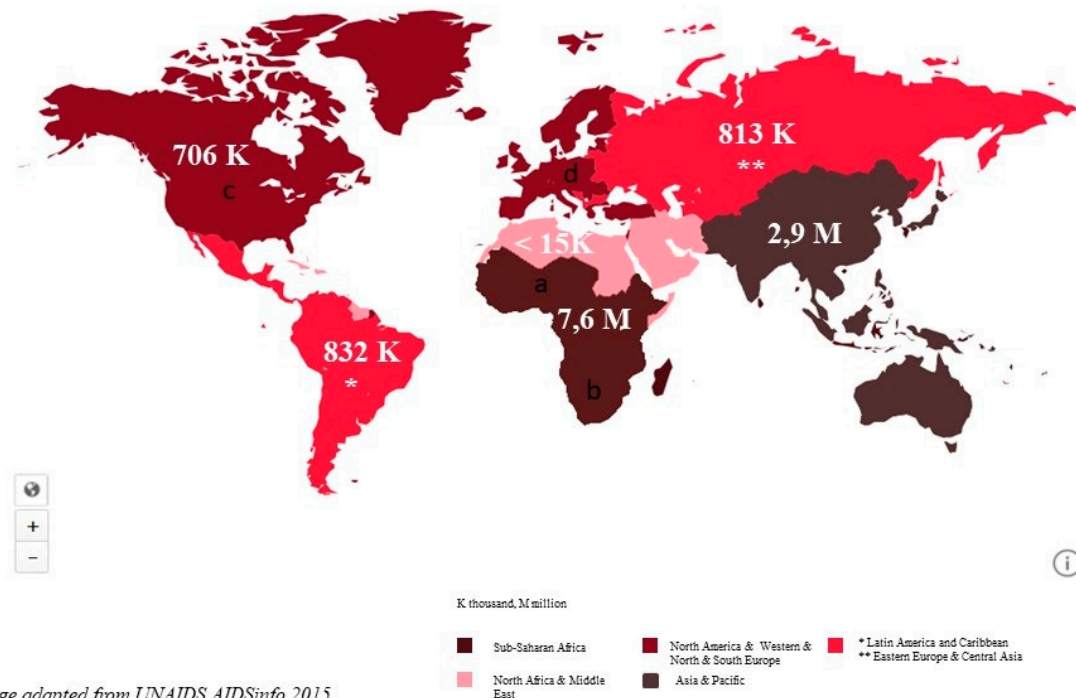

Image adapted from UNAIDS AIDSinfo 2015

Supplemental Figure S1. This figure summarizes the number of people living with *H. pylori*-HIV co-infection by UN region as follows from top to bottom: sub-Saharan Africa, followed by Asia and Pacific, Latin America and the Caribbeans, Eastern Europe, and North America/North, West, South Europe, and finally North Africa and the Middle East. a central and West Africa, 1.9M, b South Africa, 5.6M, c North America, 316K, d North, South, and West Europe, 315K.
