# Supplementary material for: Helicobacter pylori and Human Immunodeficiency Virus Co-Infection: Potential Implications for Future Gastric Cancer Risk
Source: Microorganisms. 2023 Mar 29;11(4):887. doi: 10.3390/microorganisms11040887 (PMC10145129; doi:10.3390/microorganisms11040887)
Supplement: Supplementary file 1 [file microorganisms-11-00887-s001.zip › Suppl Tables S2-S3 GC incidence & death.xlsx]

## Sheet: Feuil2
Supplemental Table S3. Incidence and deaths due to the gastric cancer from 1990 to 2017 at regional and global levels [29].
	INCIDENCE			DEATHS
REGIONS	Number of cases	Age-standardised incident rate		Number of deaths	Age-standardised death rate
sub-Sahara Africa
Western	12890	7.7		13311	8.4
Central	3555	7.1		3551	7.6
Southern	2839	5.2		2910	5.5
Eastern	10056	6.4		10087	6.8
North Africa and Middle East	35755	8.7		34530	8.8
North America & Central and Western Europe
North America	39247	6.5		22159	3.6
Central Europe	19794	9.4		18570	8.6
Western Europe	95266	10.5		62213	6.4
Eastern Europe and Central Asia
Eastern Euope	59809	17.7		43943	12.8
Central Asia	10513	14.1		10331	14.3
Latin America and Caribbean
Carribbean	4033	7.9		3684	7.3
Central LA	29601	12.9		21226	9.3
Tropical LA	21823	9.5		21140	9.3
Southern LA	10145	12.4		10203	12.3
Andean LA	8925	16.6		9130	17.1
Asia and Pacific
hi-Pacific	131636	29.5		68042	14.2
South Asia	96577	7.2		96652	7.5
Souteast Asia	39191	6.8		38871	7
East Asia	583758	28.6		371288	18.7
Oceania	988	13.8		913	14
Australasia	4263	8.8		2233	4.4
Global	1220662	15.4		864989	11

## Sheet: Feuil1
Supplemental Table S2. Number and incidence rate and number and death rate from gastric cancer at countries levels [29].
UN region and country		Number of incident gastric cancer	Incident rate (per 100000 people)	Number of deaths due to gastric cancer	Rate of deaths due to gastric cancer (per 100000 people)
West and Central Africa
Benin		497	11.5	514	12.7
Burkina Faso		1055	12.8	1063	13.7
Dem Rep Congo		2365	7.1	2371	7.6
Nigeria		2957	4	3141	4.5
East and South Africa
South Africa		18800	4.4	1940	4.6
Middle East and North Africa
Egypt		1895	3.5	1864	3.7
Libyan Arab Jamahiriya		298	6.4	279	6.4
Tunisia		591	5	578	5
Iran (Islamic Rep)		9825	14.6	9681	14.9
Lebanon		469	7.7	343	6
Oman		139	7	119	6.8
Israel		743	6.6	663	5.7
Western, Southern, and Northern Europe
France		9682	7.2	7386	5
Germany		22026	11.8	13519	6.8
Netherlands		3801	11.3	2422	6.9
Finland		880	7.5	581	4.7
Ireland		711	9.8	463	6.2
Denmark		753	6.8	570	4.9
Italy		18639	12.7	12117	7.7
Portugal		3426	15.7	2829	11.5
Spain		11881	12.3	7009	6.8
Norway		667	7.1	444	4.5
Latvia		674	17.2	489	12.1
Croatia		1107	12.5	806	8.9
Estonia		465	18.7	289	10.8
Belgium		1780	7.7	1304	5.3
Northern America
United States of America		32239	6	17751	3.2
Eastern Europe and central Asia
Czech Rep		1765	8.6	1251	6
Romania		3453	9.5	3516	9.5
Russian Federation†		40871	17.8	30566	13.1
Latin American and Caribbean
Bahamas		31	8.3	29	8.1
Argentina		5111	9.6	5295	9.8
Brazil		21399	9.5	20708	9.3
Chile		4313	18.6	4150	17.8
Ecuador		2512	17.3	2579	18
Mexico		11300	10.1	8118	7.3
Panama		954	15	346	8.7
Asia and Pacific
Kazakhstan		2237	13	2182	13
Japan		106507	29.6	55885	14.2
Malaysia		1680	7.1	1588	7.1
Nepal		1624	7.6	1673	8.1
Pakistan		5756	5.2	5682	5.5
Singapore		685	10.2	336	5.1
Thailand		4625	4.8	4209	4.4
India‡		81672	7.5	81573	7.7
Indonesia		14835	7.5	15210	8
Vietnam		8302	9	8051	8.9
China		561938	29	355379	18.8
Oceania
New Zealand		589	7.8	353	4.6
All countries*		1030524	11	699214	8.4
* Global in 2017		1220662	15.4	864989	11
